# Supplementary material for: Osteoclast proton pump regulator Atp6v1c1 enhances breast cancer growth by activating the mTORC1 pathway and bone metastasis by increasing V-ATPase activity
Source: PubMed Central journal article supplement (PMC5564597; doi:10.18632/oncotarget.17544), 2017-05-02
Supplement: oncotarget-08-47675-s001.pdf [file oncotarget-08-47675-s001.pdf]

## Osteoclast proton pump regulator *Atp6v1c1* enhances breast cancer growth by activating the mTORC1 pathway and bone metastasis by increasing V-ATPase activity

### SUPPLEMENTARY FIGURES

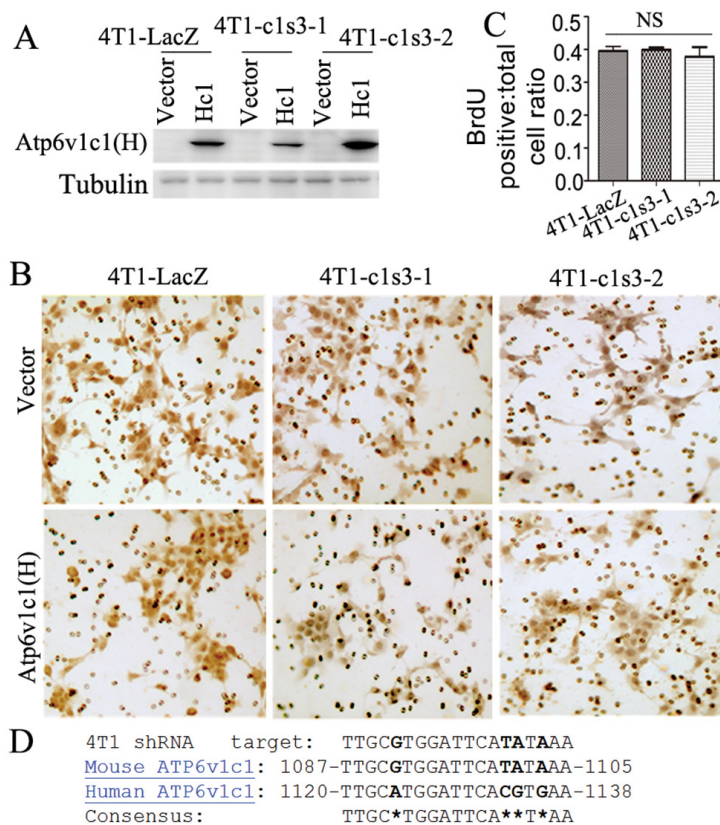

**Supplementary Figure 1: Overexpression of human *ATP6v1c1* rescues the impaired proliferation in *ATP6v1c1* knockdown 4T1 cells.** **A.** Confirmation of expression rescue by RT-PCR. **B.** BrdU proliferation assay shows more BrdU positive cells with *ATP6v1c1* reintroduction. **C.** Quantification of the BrdU results from **B.** **D.** Alignment of *ATP6v1c1* targeted shRNA with the human sequence, which is not knocked down, and murine target which is effectively knocked down. Results are mean  $\pm$  s.e.m.

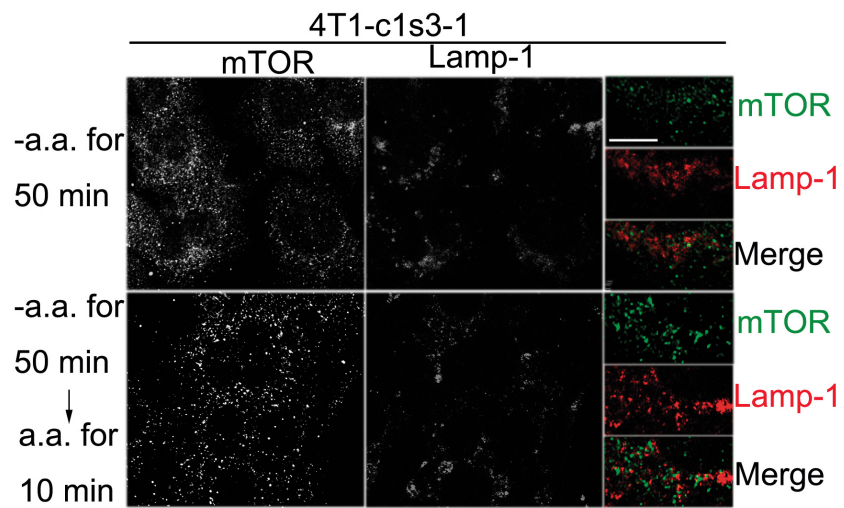

**Supplementary Figure 2:** Confocal images show that there is little LAMP-1+ lysosome and mTOR co-localization in Atp6v1c1 knockdown 4T1-c1s3-2 cells stimulated with amino acids (Green staining is mTOR, red staining is Lamp-1, and yellow staining shows the co-localization of mTOR and Lamp-1. Scale bar: 5µm).

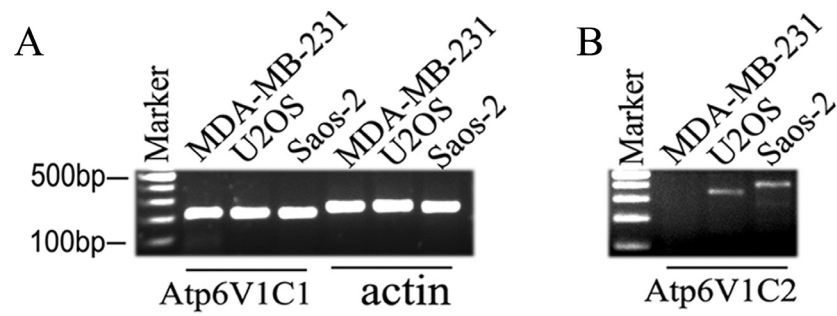

**Supplementary Figure 3: RT-PCR analysis shows that the expression of ATP6v1c1 is stronger than the expression of ATP6v1c2 in various tumor cell lines.** RT-PCR analysis shows that the expression of ATP6v1c1 **A.** is greater than expression of ATP6v1c2 **B.** in various tumor cell lines. Cell lines include the human breast cancer cell line MDA-MB-231 and the human osteosarcoma cell lines U2OS and Saos-2 performed with gene-specific primers for human ATP6V1C1, ATP6V1C2, and  $\beta$ -actin.

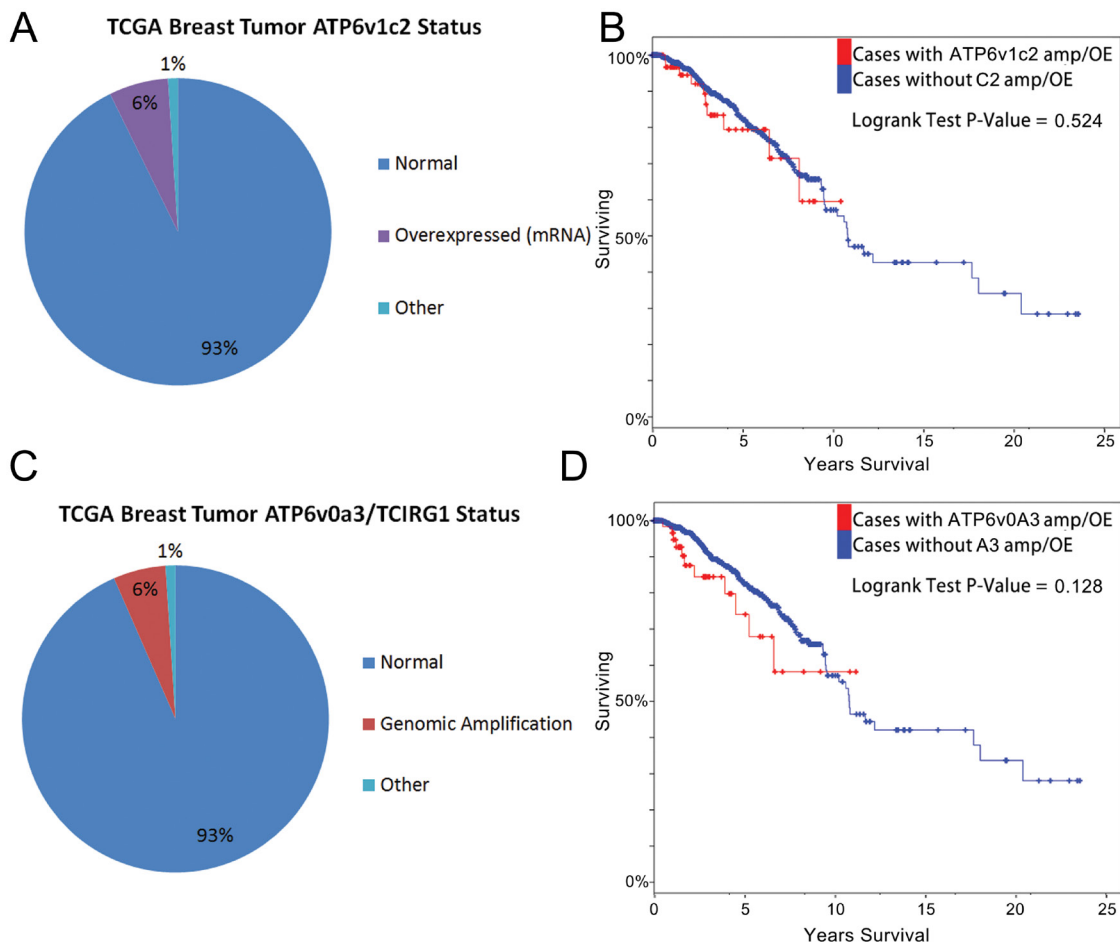

**Supplementary Figure 4: ATP6v1c2 and ATP6v0a3 are rarely amplified or overexpressed and are not associated with differences in breast cancer survival.** **A.** TCGA data show genomic amplification and overexpression of ATP6v1c2 is rare in breast cancer – with overexpression being more common than amplification. **B.** Comparative survival curves for ATP6v1c2 overexpressing and those with normal levels of ATPv1c2 expression. **C.** TCGA data show genomic amplification and overexpression of ATP6v0a3 is rare in breast cancer – with genomic amplification being more common than overexpression. **D.** Comparative survival curves for ATP6v0a3 overexpressing and those with normal levels of expression.
